# Supplementary material
Source: PubMed Central journal article supplement (PMC6616256)
Supplement: baADV2019000068-suppl1.pdf [file baADV2019000068-suppl1.pdf]

*Online Supplement*

**Transient and Chronic Childhood Immune Thrombocytopenia  
Are Distinctly Affected by Fc-Gamma Receptor Polymorphisms**

David E. Schmidt, Katja M. J. Heitink-Pollé, Annemieke G. Laarhoven,  
Marrie C.A. Bruin, Barbera Veldhuisen, Sietse Q. Nagelkerke, Taco W. Kuijpers,  
Leendert Porcelijn, C. Ellen van der Schoot, Gestur Vidarsson, Masja de Haas

**Supplementary Figure 1.** Effect of genotypes of *FCGR2B*\*232I/T variant on longitudinal platelet counts in patients with newly diagnosed ITP. Patients in the observation cohort with the *FCGR2B*\*232I/I variant showed a predisposition to early recovery at week 1 (see Heitink-Pollé *et al.* Blood 2018). There were no differences in platelet count trajectories seen during follow-up.

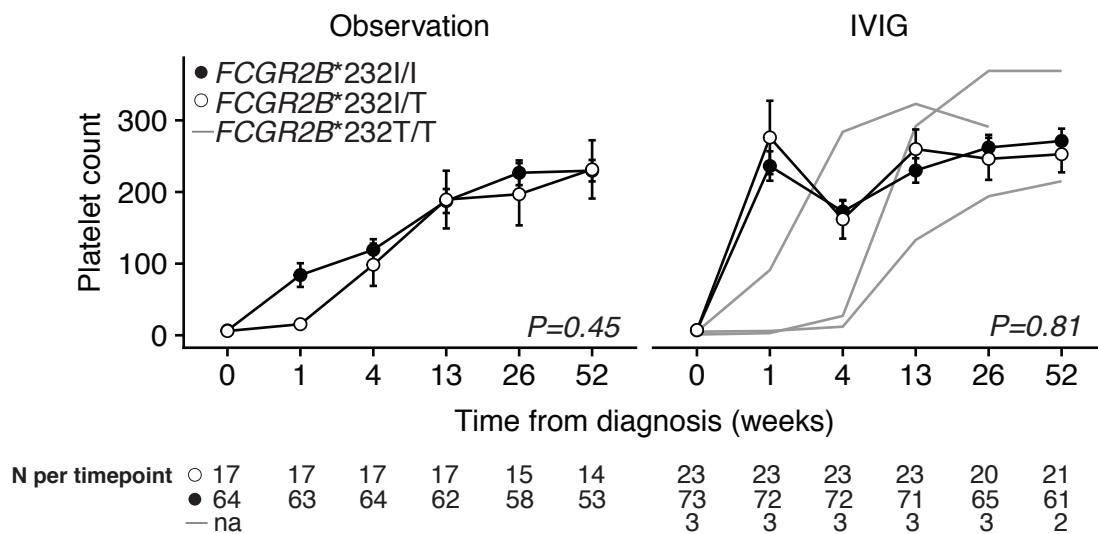

**Supplementary Table S1.** Systematic search (PubMed and EMBASE) of articles describing genotyping of FCGR2/3 variants in childhood ITP.

**Pubmed (2018-04-18)**

| Search | Query                                                                                                                                                                                         |
|--------|-----------------------------------------------------------------------------------------------------------------------------------------------------------------------------------------------|
| #35    | Search (((#34) AND #27) AND #22) AND #19                                                                                                                                                      |
| #34    | Search (#33 OR #32 OR #30 OR #29 OR #28)                                                                                                                                                      |
| #33    | Search single nucleotide polymorphism                                                                                                                                                         |
| #32    | Search variant                                                                                                                                                                                |
| #31    | Search single nucleotide polymorphism                                                                                                                                                         |
| #30    | Search mutation                                                                                                                                                                               |
| #29    | Search snp                                                                                                                                                                                    |
| #28    | Search polymorphism                                                                                                                                                                           |
| #27    | Search (#23 OR #24 OR #25 OR #26)                                                                                                                                                             |
| #26    | Search Fc-gamma                                                                                                                                                                               |
| #25    | Search FCGR*                                                                                                                                                                                  |
| #24    | Search fc gamma receptor                                                                                                                                                                      |
| #23    | Search fc receptor                                                                                                                                                                            |
| #22    | Search (#10 OR "Purpura, Thrombocytopenic, Idiopathic"[Mesh])                                                                                                                                 |
| #19    | Search (#16 OR ("Pediatrics"[Mesh]))                                                                                                                                                          |
| #16    | Search (#12 or #13 or #14 OR #15)                                                                                                                                                             |
| #15    | Search childhood                                                                                                                                                                              |
| #14    | Search paediatric                                                                                                                                                                             |
| #13    | Search pediatric                                                                                                                                                                              |
| #12    | Search child*                                                                                                                                                                                 |
| #11    | Search child                                                                                                                                                                                  |
| #10    | Search (#1 OR #2 OR #3 OR #4 OR #5 OR #6 OR #7)                                                                                                                                               |
| #9     | Search (((((ITP) OR immune thrombocytopenia) OR idiopathic thrombocytopenia) OR idiopathic thrombo*) OR immune thrombo*) OR autoimmune thrombo*                                               |
| #8     | Search (((((autoimmune thrombo*) AND immune thrombo*) AND idiopathic thrombo*) AND idiopathic thrombocytopenic purpura) AND idiopathic thrombocytopenia) AND immune thrombocytopenia) AND ITP |
| #7     | Search autoimmune thrombo*                                                                                                                                                                    |
| #6     | Search immune thrombo*                                                                                                                                                                        |
| #5     | Search idiopathic thrombo*                                                                                                                                                                    |
| #4     | Search idiopathic thrombocytopenic purpura                                                                                                                                                    |
| #3     | Search idiopathic thrombocytopenia                                                                                                                                                            |
| #2     | Search immune thrombocytopenia                                                                                                                                                                |
| #1     | Search ITP                                                                                                                                                                                    |

**Embase (2018-04-19)**

| Search | Query                                                                                                                                                                                                                          |
|--------|--------------------------------------------------------------------------------------------------------------------------------------------------------------------------------------------------------------------------------|
| 1.     | ITP.mp. [mp=title, abstract, heading word, drug trade name, original title, device manufacturer, drug manufacturer, device trade name, keyword, floating subheading word, candidate term word]                                 |
| 2.     | immune thrombocytopenia.mp. [mp=title, abstract, heading word, drug trade name, original title, device manufacturer, drug manufacturer, device trade name, keyword, floating subheading word, candidate term word]             |
| 3.     | idiopathic thrombocytopenia.mp. [mp=title, abstract, heading word, drug trade name, original title, device manufacturer, drug manufacturer, device trade name, keyword, floating subheading word, candidate term word]         |
| 4.     | idiopathic thrombocytopenic purpura.mp. [mp=title, abstract, heading word, drug trade name, original title, device manufacturer, drug manufacturer, device trade name, keyword, floating subheading word, candidate term word] |
| 5.     | idiopathic thrombo*.mp. [mp=title, abstract, heading word, drug trade name, original title, device manufacturer, drug manufacturer, device trade name, keyword, floating subheading word, candidate term word]                 |
| 6.     | immune thrombo*.mp. [mp=title, abstract, heading word, drug trade name, original title, device manufacturer, drug manufacturer, device trade name, keyword, floating subheading word, candidate term word]                     |
| 7.     | autoimmune thrombo*.mp. [mp=title, abstract, heading word, drug trade name, original title, device manufacturer, drug manufacturer, device trade name, keyword, floating subheading word, candidate term word]                 |
| 8.     | exp *idiopathic thrombocytopenic purpura/                                                                                                                                                                                      |
| 9.     | 1 or 2 or 3 or 4 or 5 or 6 or 7 or 8                                                                                                                                                                                           |
| 10.    | pediatrics/                                                                                                                                                                                                                    |
| 11.    | exp *pediatrics/                                                                                                                                                                                                               |
| 12.    | pediatrics.mp. [mp=title, abstract, heading word, drug trade name, original title, device manufacturer, drug manufacturer, device trade name, keyword, floating subheading word, candidate term word]                          |
| 13.    | paediatrics.mp. [mp=title, abstract, heading word, drug trade name, original title, device manufacturer, drug manufacturer, device trade name, keyword, floating subheading word, candidate term word]                         |
| 14.    | child*.mp. [mp=title, abstract, heading word, drug trade name, original title, device manufacturer, drug manufacturer, device trade name, keyword, floating subheading word, candidate term word]                              |

15. child.mp. [mp=title, abstract, heading word, drug trade name, original title, device manufacturer, drug manufacturer, device trade name, keyword, floating subheading word, candidate term word]
16. childhood.mp. [mp=title, abstract, heading word, drug trade name, original title, device manufacturer, drug manufacturer, device trade name, keyword, floating subheading word, candidate term word]
17. 10 or 11 or 12 or 13 or 14 or 15 or 16
18. fc receptor.mp. [mp=title, abstract, heading word, drug trade name, original title, device manufacturer, drug manufacturer, device trade name, keyword, floating subheading word, candidate term word]
19. fc gamma receptor.mp. [mp=title, abstract, heading word, drug trade name, original title, device manufacturer, drug manufacturer, device trade name, keyword, floating subheading word, candidate term word]
20. FCGR\*.mp. [mp=title, abstract, heading word, drug trade name, original title, device manufacturer, drug manufacturer, device trade name, keyword, floating subheading word, candidate term word]
21. Fc-gamma.mp. [mp=title, abstract, heading word, drug trade name, original title, device manufacturer, drug manufacturer, device trade name, keyword, floating subheading word, candidate term word]
22. 18 or 19 or 20 or 21
23. polymorphism.mp. [mp=title, abstract, heading word, drug trade name, original title, device manufacturer, drug manufacturer, device trade name, keyword, floating subheading word, candidate term word]
24. snp.mp. [mp=title, abstract, heading word, drug trade name, original title, device manufacturer, drug manufacturer, device trade name, keyword, floating subheading word, candidate term word]
25. mutation.mp. [mp=title, abstract, heading word, drug trade name, original title, device manufacturer, drug manufacturer, device trade name, keyword, floating subheading word, candidate term word]
26. variant.mp. [mp=title, abstract, heading word, drug trade name, original title, device manufacturer, drug manufacturer, device trade name, keyword, floating subheading word, candidate term word]
27. single nucleotide polymorphism.mp. [mp=title, abstract, heading word, drug trade name, original title, device manufacturer, drug manufacturer, device trade name, keyword, floating subheading word, candidate term word]
28. 23 or 24 or 25 or 26 or 27
29. 9 and 17 and 22 and 28

**Supplementary Table S2.** Characteristics of studies included in meta analysis for the association of FCGR2/3 polymorphisms and susceptibility to childhood ITP.

| <b>Study and year</b> | <b>Controls (N)</b> | <b>Childhood ITP (N)</b> | <b>Age (mean)</b> | <b>Age (sd)</b> | <b>Female (proportion)</b> | <b>Chronic ITP (proportion)</b> | <b>Setting</b> | <b>Ethnicity</b> | <b>Country</b> | <b>Genotyping method</b> |
|-----------------------|---------------------|--------------------------|-------------------|-----------------|----------------------------|---------------------------------|----------------|------------------|----------------|--------------------------|
| Carcao 2003           | 130                 | 98                       | 7,1               | 5,1             | 0,52                       | 0,72                            | Academic       | No               | Canada         | RFLP                     |
| Amorim 2012           | 78                  | 39                       | 12,5              | 3,9             | 0,54                       | 0,85                            | Academic       | No               | Brazil         | RFLP                     |
| Papagianni 2013       | 45                  | 53                       | 5,9               | 3,9             | 0,51                       | 0,4                             | Academic       | No               | Greece         | RFLP                     |
| Bruin 2004            | 154                 | 60                       | 7,2               | NA              | 0,55                       | 0,27                            | Academic       | No               | Netherlands    | MLPA                     |
| Breunis 2008          | 100                 | 72                       | NA                | NA              | NA                         | NA                              | Academic       | No               | Netherlands    | MLPA                     |
| TIKI                  | 199                 | 180                      | 4.1*              | 2.6 - 7.7*      | 0,47                       | 0,1                             | Peripheral     | Yes              | Netherlands    | MLPA                     |
| Foster 2001           | 219                 | 37                       | NA                | NA              | NA                         | NA                              | NA             | Caucasian        | USA            | Oligohybridization       |
| Eyada 2012            | 90                  | 92                       | 8,3               | 4,5             | 0,52                       | 0,87                            | Academic       | NA               | Egypt          | RFLP                     |
| Rajantie 2004         | 6                   | 16                       | 6,1               | 4               | 0,5                        | 1                               | Academic       | NA               | Finland        | RFLP                     |

\* Median (IQR) is given

**Supplementary Table S3.** Sensitivity analysis for distribution of polymorphisms for susceptibility to childhood immune thrombocytopenia

|                              | Newly diagnosed ITP (N=180) |         |           |        |       | Newly diagnosed ITP, caucasian (N=123) |         |           |        |       |
|------------------------------|-----------------------------|---------|-----------|--------|-------|----------------------------------------|---------|-----------|--------|-------|
|                              | 0                           | 1       | 2         | 3      | 4     | 0                                      | 1       | 2         | 3      | 4     |
| <b>Copy number variation</b> |                             |         |           |        |       |                                        |         |           |        |       |
| CNR1                         | 0 (0)                       | 12 (7)  | 152 (84)  | 16 (9) | 0 (0) | 0 (0)                                  | 7 (6)   | 106 (86)  | 10 (8) | 0 (0) |
| CNR2                         | 0 (0)                       | 0 (0)   | 173 (96)  | 7 (4)  | 0 (0) | 0 (0)                                  | 0 (0)   | 119 (97)  | 4 (3)  | 0 (0) |
| CNR3                         | 0 (0)                       | 0 (0)   | 180 (100) | 0 (0)  | 0 (0) | 0 (0)                                  | 0 (0)   | 123 (100) | 0 (0)  | 0 (0) |
| <b>Alleles</b>               |                             |         |           |        |       |                                        |         |           |        |       |
| FCGR2A*27W                   | 127 (71)                    | 49 (27) | 4 (2)     | 0 (0)  | 0 (0) | 90 (73)                                | 30 (24) | 3 (2)     | 0 (0)  | 0 (0) |
| FCGR2A*131H                  | 39 (22)                     | 95 (53) | 46 (26)   | 0 (0)  | 0 (0) | 25 (20)                                | 67 (55) | 31 (25)   | 0 (0)  | 0 (0) |
| FCGR2B*232T                  | 137 (76)                    | 40 (22) | 3 (2)     | 0 (0)  | 0 (0) | 99 (81)                                | 21 (17) | 3 (2)     | 0 (0)  | 0 (0) |
| FCGR2C*ORF                   | 122 (68)                    | 56 (31) | 2 (1)     | 0 (0)  | 0 (0) | 85 (69)                                | 36 (29) | 2 (2)     | 0 (0)  | 0 (0) |
| FCGR2C*ncORF                 | 170 (94)                    | 3 (2)   | 7 (4)     | 0 (0)  | 0 (0) | 115 (94)                               | 2 (2)   | 6 (5)     | 0 (0)  | 0 (0) |
| FCGR3A*158V                  | 62 (34)                     | 85 (47) | 33 (18)   | 0 (0)  | 0 (0) | 47 (38)                                | 52 (42) | 24 (20)   | 0 (0)  | 0 (0) |
| FCGR3B*NA2                   | 20 (11)                     | 83 (46) | 77 (43)   | 0 (0)  | 0 (0) | 15 (12)                                | 56 (46) | 52 (43)   | 0 (0)  | 0 (0) |
| FCGR3B*SH                    | 172 (96)                    | 8 (4)   | 0 (0)     | 0 (0)  | 0 (0) | 116 (94)                               | 7 (6)   | 0 (0)     | 0 (0)  | 0 (0) |
| FCGR2 promoter 2B.4          | 134 (74)                    | 46 (26) | 0 (0)     | 0 (0)  | 0 (0) | 92 (75)                                | 31 (25) | 0 (0)     | 0 (0)  | 0 (0) |

*N(% of cohort).*

**Supplementary Table S4.** Susceptibility to transient, self-limiting/IVIg-responsive childhood immune thrombocytopenia

|                              | Healthy controls (N=180) |         |           |        |       | Transient ITP (Self-limiting or IVIg-responsive) TIKI (N=131) |         |           |       |       | P                |
|------------------------------|--------------------------|---------|-----------|--------|-------|---------------------------------------------------------------|---------|-----------|-------|-------|------------------|
|                              | 0                        | 1       | 2         | 3      | 4     | 0                                                             | 1       | 2         | 3     | 4     |                  |
| <b>Copy number variation</b> |                          |         |           |        |       |                                                               |         |           |       |       |                  |
| CNR1                         | 0 (0)                    | 12 (7)  | 155 (86)  | 12 (7) | 1 (1) | 0 (0)                                                         | 4 (3)   | 118 (90)  | 9 (7) | 0 (0) | 0.44             |
| CNR2                         | 0 (0)                    | 1 (1)   | 168 (93)  | 11 (6) | 0 (0) | 0 (0)                                                         | 0 (0)   | 126 (96)  | 5 (4) | 0 (0) | 0.51             |
| CNR3                         | 0 (0)                    | 0 (0)   | 180 (100) | 0 (0)  | 0 (0) | 0 (0)                                                         | 0 (0)   | 131 (100) | 0 (0) | 0 (0) | ND               |
| <b>Alleles</b>               |                          |         |           |        |       |                                                               |         |           |       |       |                  |
| FCGR2A*27W                   | 146 (81)                 | 29 (16) | 5 (3)     | 0 (0)  | 0 (0) | 88 (67)                                                       | 39 (30) | 4 (3)     | 0 (0) | 0 (0) | <b>0.013</b>     |
| FCGR2A*131H                  | 38 (21)                  | 87 (48) | 55 (31)   | 0 (0)  | 0 (0) | 27 (21)                                                       | 68 (52) | 36 (27)   | 0 (0) | 0 (0) | 0.82             |
| FCGR2B*232T                  | 143 (79)                 | 31 (17) | 6 (3)     | 0 (0)  | 0 (0) | 98 (75)                                                       | 30 (23) | 3 (2)     | 0 (0) | 0 (0) | 0.41             |
| FCGR2C*ORF                   | 143 (79)                 | 32 (18) | 5 (3)     | 0 (0)  | 0 (0) | 81 (62)                                                       | 48 (37) | 2 (2)     | 0 (0) | 0 (0) | <b>&lt;0.001</b> |
| FCGR2C*ncORF                 | 173 (96)                 | 3 (2)   | 4 (2)     | 0 (0)  | 0 (0) | 125 (95)                                                      | 3 (2)   | 3 (2)     | 0 (0) | 0 (0) | 0.91             |
| FCGR3A*158V                  | 79 (44)                  | 78 (43) | 23 (13)   | 0 (0)  | 0 (0) | 46 (35)                                                       | 63 (48) | 22 (17)   | 0 (0) | 0 (0) | 0.27             |
| FCGR3B*NA2                   | 31 (17)                  | 79 (44) | 68 (38)   | 2 (1)  | 0 (0) | 11 (8)                                                        | 66 (50) | 54 (42)   | 0 (0) | 0 (0) | 0.07             |
| FCGR3B*SH                    | 173 (96)                 | 7 (4)   | 0 (0)     | 0 (0)  | 0 (0) | 128 (98)                                                      | 3 (2)   | 0 (0)     | 0 (0) | 0 (0) | 0.53             |
| FCGR2 promoter 2B.4          | 145 (81)                 | 31 (17) | 4 (2)     | 0 (0)  | 0 (0) | 92 (70)                                                       | 39 (30) | 0 (0)     | 0 (0) | 0 (0) | <b>0.007</b>     |

*N(% of cohort). Frequency P-value by Fisher's exact test. ND, not performed.*

*Transient ITP was defined as spontaneous recovery or a favorable response to IVIg 3 months after diagnosis.*

**Supplementary Table S5.** Recovery rate of patients in observation and IVIg groups stratified by *FCGR2C*\*ORF haplotype

|                      | Recovery in Observation |             | Recovery in IVIG |             |
|----------------------|-------------------------|-------------|------------------|-------------|
|                      | ORF (N=27)              | STOP (N=54) | ORF (N=31)       | STOP (N=68) |
| <i>Week 1, n/N</i>   | 27                      | 53          | 31               | 67          |
| CR                   | 8 (30)                  | 7 (13)      | 26 (84)          | 41 (61)     |
| PR                   | 5 (19)                  | 9 (17)      | 2 (6)            | 7 (10)      |
| NR                   | 14 (52)                 | 37 (70)     | 3 (10)           | 19 (28)     |
| <i>Month 1, n/N</i>  | 27                      | 54          | 31               | 67          |
| CR                   | 13 (48)                 | 20 (37)     | 25 (81)          | 37 (55)     |
| PR                   | 5 (19)                  | 12 (22)     | 4 (13)           | 14 (21)     |
| NR                   | 9 (33)                  | 22 (41)     | 2 (6)            | 16 (24)     |
| <i>Month 3, n/N</i>  | 27                      | 52          | 31               | 66          |
| CR                   | 20 (74)                 | 31 (60)     | 29 (94)          | 47 (71)     |
| PR                   | 4 (15)                  | 7 (13)      | 2 (6)            | 6 (9)       |
| NR                   | 3 (11)                  | 14 (27)     | -                | 13 (20)     |
| <i>Month 6, n/N</i>  | 25                      | 48          | 30               | 58          |
| CR                   | 22 (88)                 | 34 (71)     | 29 (97)          | 43 (74)     |
| PR                   | 1 (4)                   | 5 (10)      | 1 (3)            | 7 (12)      |
| NR                   | 2 (8)                   | 9 (19)      | -                | 8 (14)      |
| <i>Month 12, n/N</i> | 23                      | 44          | 25               | 59          |
| CR                   | 22 (96)                 | 34 (77)     | 25 (100)         | 49 (83)     |
| PR                   | -                       | 6 (14)      | -                | 6 (10)      |
| NR                   | 1 (4)                   | 4 (9)       | -                | 4 (7)       |

Data are presented as n (column %). n/N, response data available for n patients of N.

CR, PR, NR - complete, partial and no recovery; based on platelet count (Rodeghiero Blood 2009)



**Supplementary Table S6.** Subgroup analysis for differences between transient and chronic childhood ITP stratified by treatment group

|                 | Copies | Chronic ITP      | Transient ITP (Observation group) | IVIg responsive ITP (IVIG group) |
|-----------------|--------|------------------|-----------------------------------|----------------------------------|
| n               |        | 43               | 51                                | 80                               |
| CNR1 (%)        | 1      | <b>7 (16.3)</b>  | <b>1 (2.0)</b>                    | <b>3 (3.8)</b>                   |
|                 | 2      | 33 (76.7)        | 47 (92.2)                         | 71 (88.8)                        |
|                 | 3      | 3 (7.0)          | 3 (5.9)                           | 6 (7.5)                          |
| CNR2 (%)        | 1      | 1 (2.3)          | 0 (0.0)                           | 0 (0.0)                          |
|                 | 2      | 42 (97.7)        | 47 (92.2)                         | 79 (98.8)                        |
|                 | 3      | 0 (0.0)          | 4 (7.8)                           | 1 (1.2)                          |
| CNR3 (%)        | 2      | 43 (100.0)       | 51 (100.0)                        | 80 (100.0)                       |
| FCGR2A*27W (%)  | 0      | <b>37 (86.0)</b> | <b>37 (72.5)</b>                  | <b>51 (63.7)</b>                 |
|                 | 1      | 5 (11.6)         | 12 (23.5)                         | 27 (33.8)                        |
|                 | 2      | 1 (2.3)          | 2 (3.9)                           | 2 (2.5)                          |
| FCGR2A*131H (%) | 0      | 11 (25.6)        | 14 (27.5)                         | 13 (16.2)                        |
|                 | 1      | 18 (41.9)        | 27 (52.9)                         | 41 (51.2)                        |
|                 | 2      | 14 (32.6)        | 10 (19.6)                         | 26 (32.5)                        |
| FCGR2B*232T (%) | 0      | 31 (72.1)        | 41 (80.4)                         | 57 (71.2)                        |
|                 | 1      | 10 (23.3)        | 10 (19.6)                         | 20 (25.0)                        |
|                 | 2      | 2 (4.7)          | 0 (0.0)                           | 3 (3.8)                          |
| FGR2C*ORF (%)   | 0      | <b>38 (88.4)</b> | <b>31 (60.8)</b>                  | <b>50 (62.5)</b>                 |
|                 | 1      | 5 (11.6)         | 19 (37.3)                         | 29 (36.2)                        |
|                 | 2      | 0 (0.0)          | 1 (2.0)                           | 1 (1.2)                          |
| FGR2C*ncORF (%) | 0      | 38 (88.4)        | 49 (96.1)                         | 76 (95.0)                        |
|                 | 1      | 2 (4.7)          | 1 (2.0)                           | 2 (2.5)                          |
|                 | 2      | 3 (7.0)          | 1 (2.0)                           | 2 (2.5)                          |
| FCGR3A*158V (%) | 0      | 13 (30.2)        | 17 (33.3)                         | 29 (36.2)                        |
|                 | 1      | 22 (51.2)        | 21 (41.2)                         | 42 (52.5)                        |
|                 | 2      | 8 (18.6)         | 13 (25.5)                         | 9 (11.2)                         |
| FCGR3B*NA2 (%)  | 0      | 9 (20.9)         | 2 (3.9)                           | 9 (11.2)                         |
|                 | 1      | 18 (41.9)        | 24 (47.1)                         | 42 (52.5)                        |
|                 | 2      | 16 (37.2)        | 25 (49.0)                         | 29 (36.2)                        |
| FCGR3B*SH (%)   | 0      | 39 (90.7)        | 50 (98.0)                         | 78 (97.5)                        |
|                 | 1      | 4 (9.3)          | 1 (2.0)                           | 2 (2.5)                          |
| 2B.4 (%)        | 0      | 37 (86.0)        | 32 (62.7)                         | 60 (75.0)                        |
|                 | 1      | <b>6 (14.0)</b>  | <b>19 (37.3)</b>                  | <b>20 (25.0)</b>                 |

Bold lines for variables that were different between chronic ITP and transient ITP at P < 0.05 (Table 4).
